# Supplementary material for: Timing of Hepatectomy for Resectable Synchronous Colorectal Liver Metastases: For Whom Simultaneous Resection Is More Suitable - A Meta-Analysis
Source: PubMed Central journal article supplement (PMC4122440; doi:10.1371/journal.pone.0104348), 2014-08-05
Supplement: pone.0104348.s002.pdf [file pone.0104348.s002.pdf]

# Figure S2

## Subtype analysis of pooled postoperative morbidity

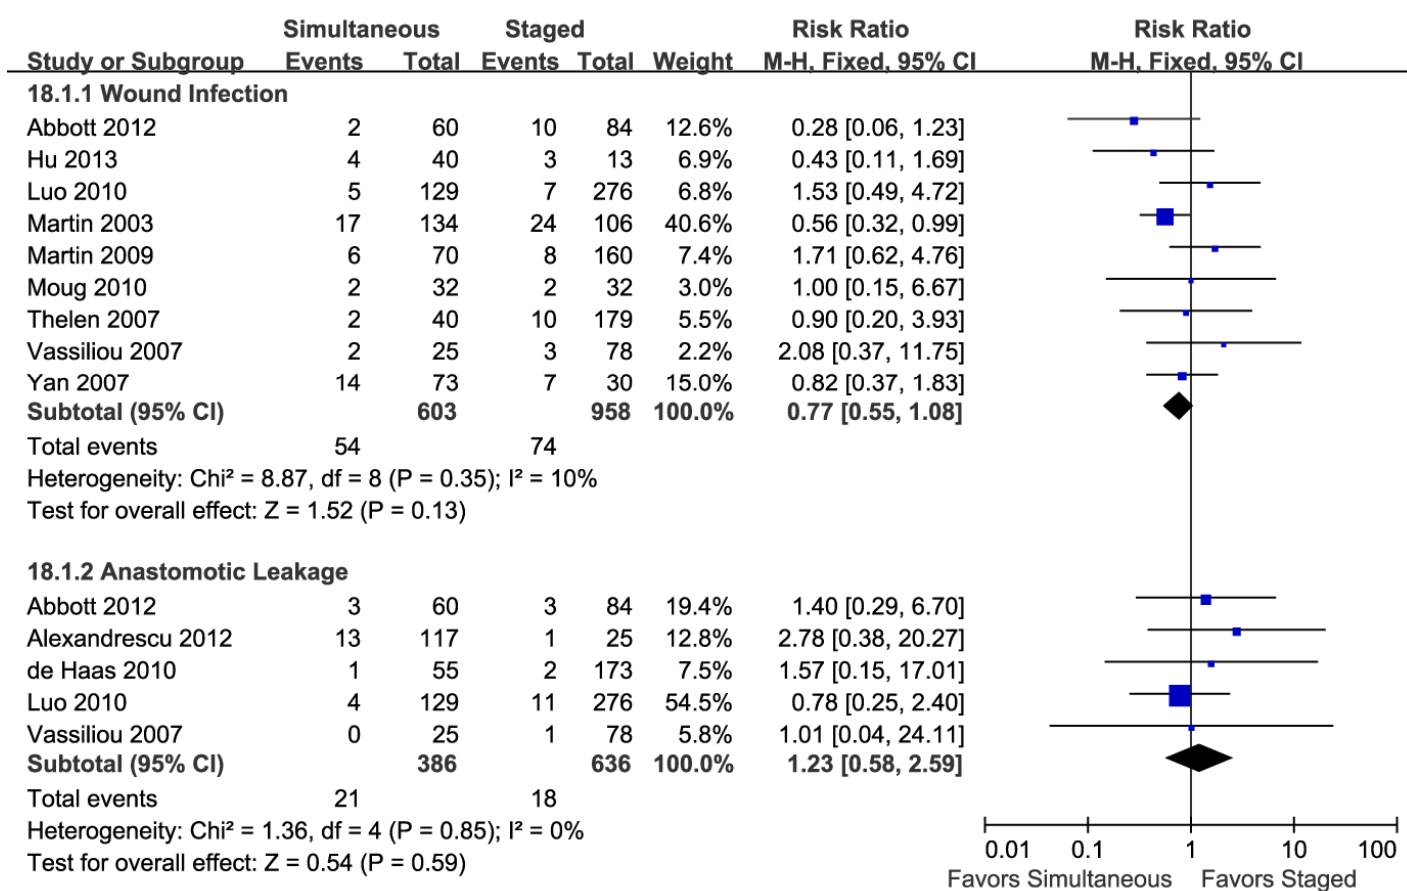

### Forest plots on subtype analysis of postoperative morbidity.

M-H: Mantel-Haenszel method

Favours Simultaneous: Simultaneous group had lower postoperative morbidity.

Favours Staged: Staged group had lower postoperative morbidity.

Pooled result showed no significant difference between simultaneous and staged groups in wound infection and anastomotic leakage.

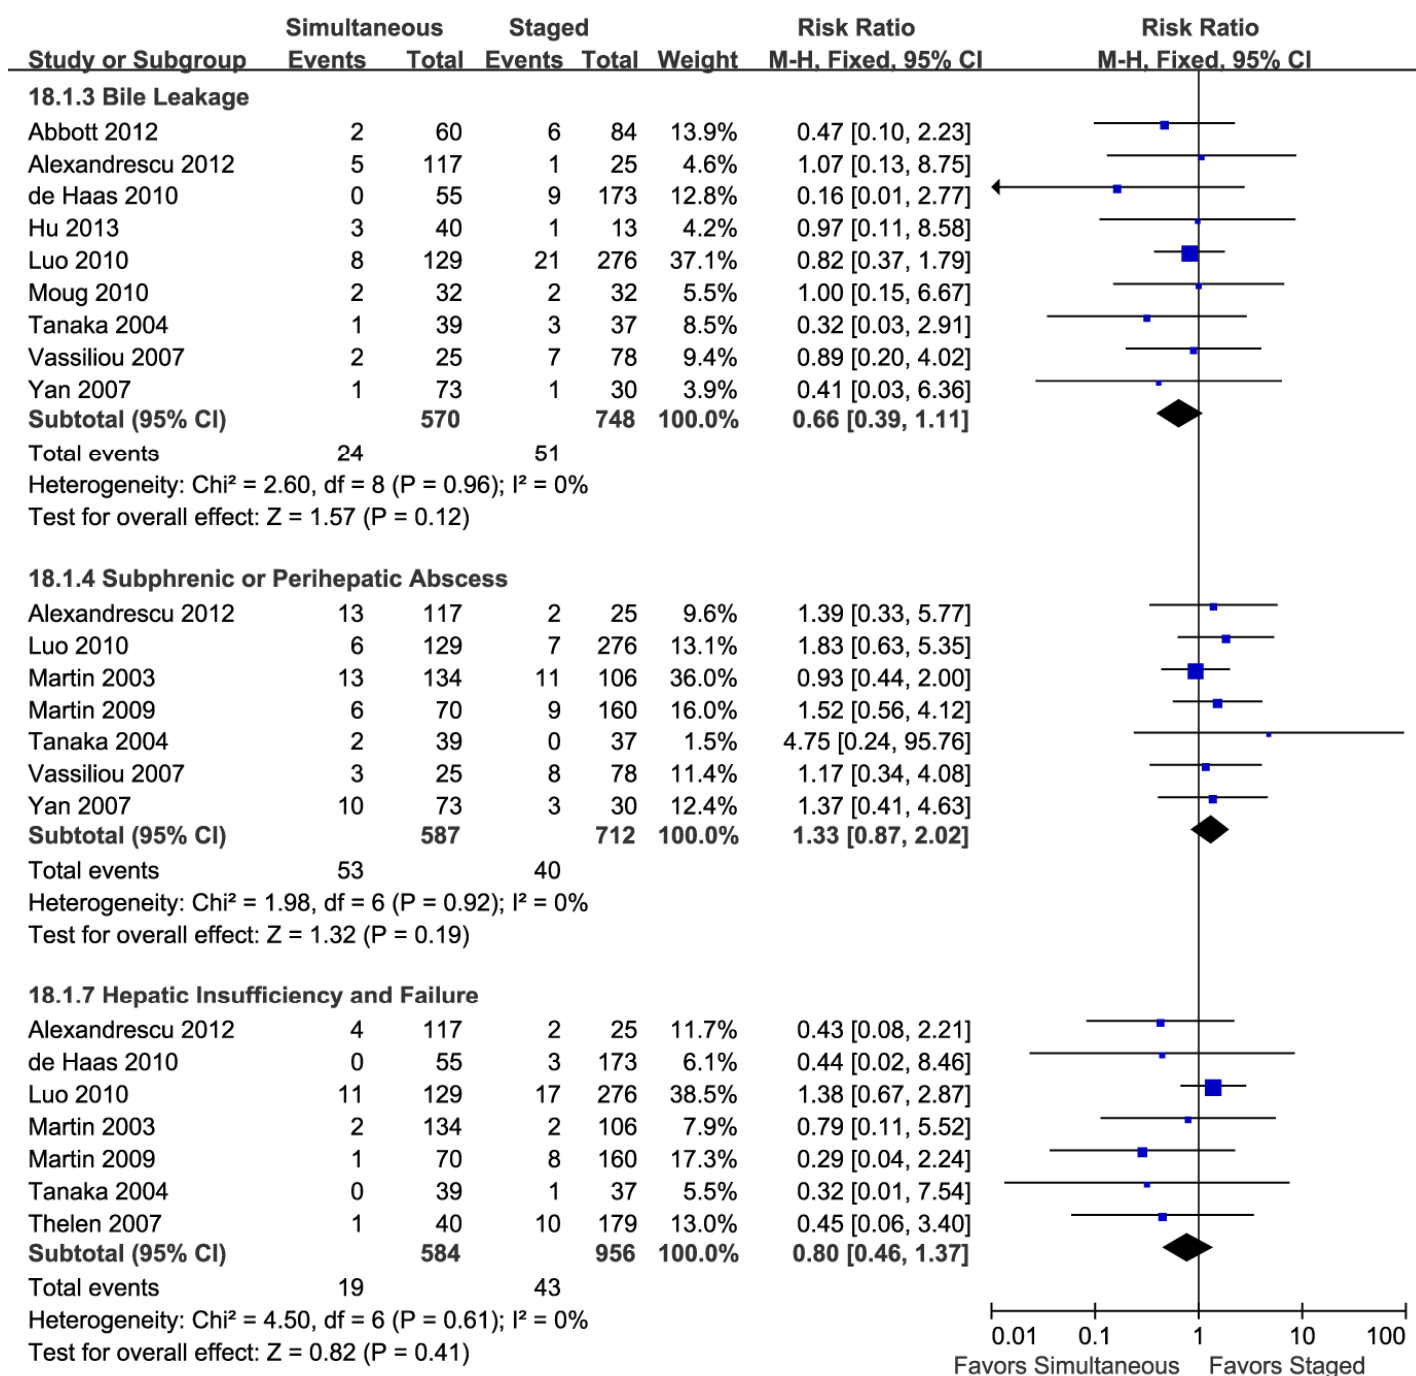

### Forest plots on subtype analysis of postoperative morbidity.

M-H: Mantel-Haenszel method

Favours Simultaneous: Simultaneous group had lower postoperative morbidity.

Favours Staged: Staged group had lower postoperative morbidity.

Pooled result showed no significant difference between simultaneous and staged groups in bile leakage, subphrenic/perihepatic abscess and hepatic insufficiency/failure.

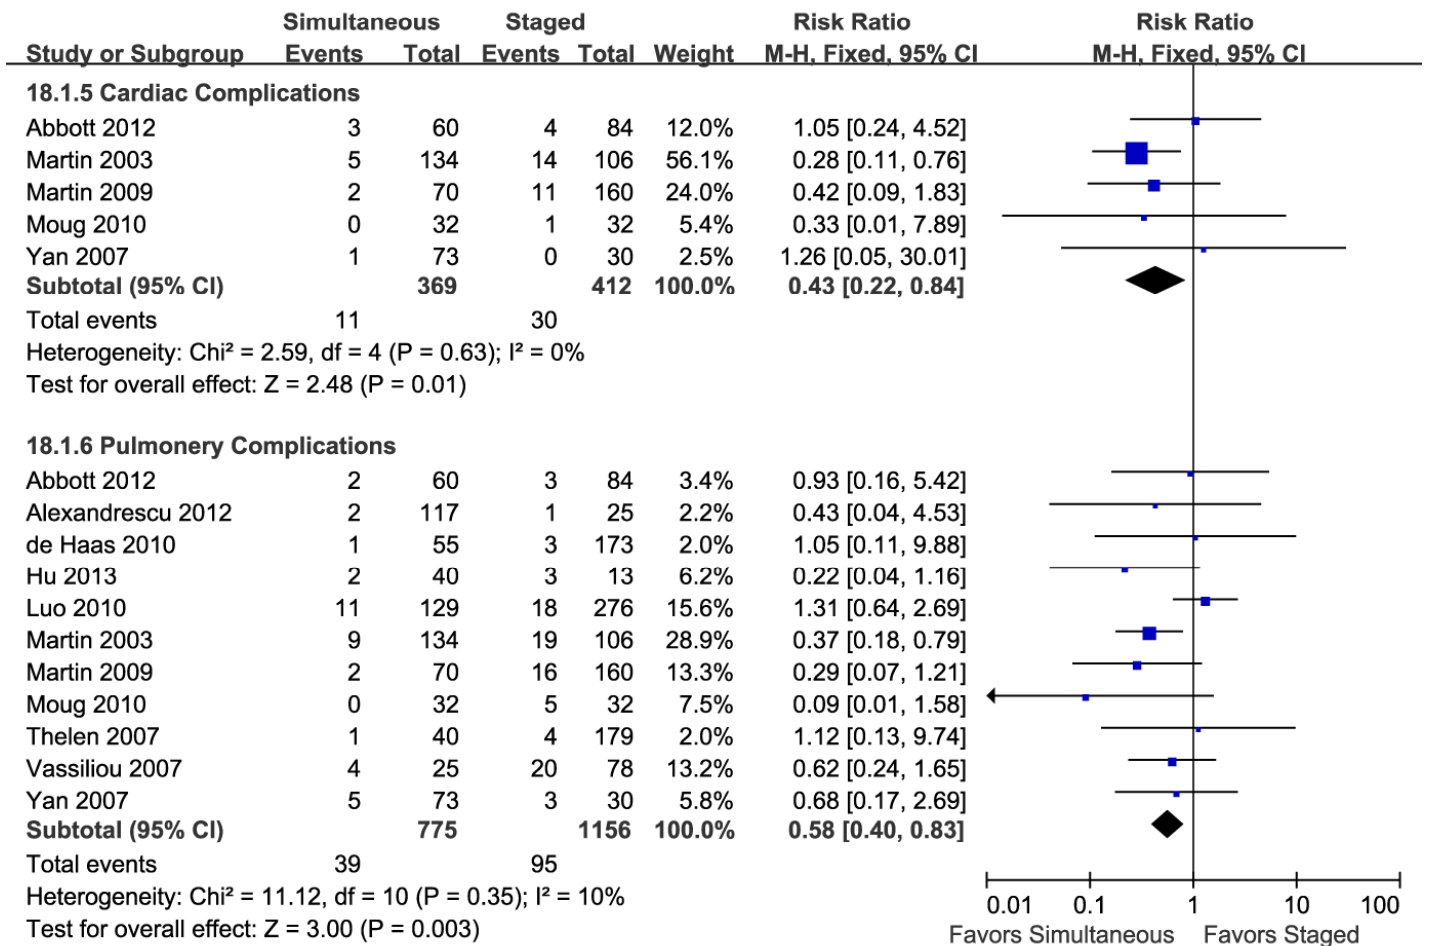

### Forest plots on subtype analysis of postoperative morbidity.

M-H: Mantel-Haenszel method

Favours Simultaneous: Simultaneous group had lower postoperative morbidity.

Favours Staged: Staged group had lower postoperative morbidity.

Pooled result showed that simultaneous resection had significant lower morbidity in cardiac and pulmonary complications.
