# Supplementary material for: Timing of Hepatectomy for Resectable Synchronous Colorectal Liver Metastases: For Whom Simultaneous Resection Is More Suitable - A Meta-Analysis
Source: PubMed Central journal article supplement (PMC4122440; doi:10.1371/journal.pone.0104348), 2014-08-05
Supplement: pone.0104348.s003.pdf [file pone.0104348.s003.pdf]

# Figure S3

## Pooled disease-free survival

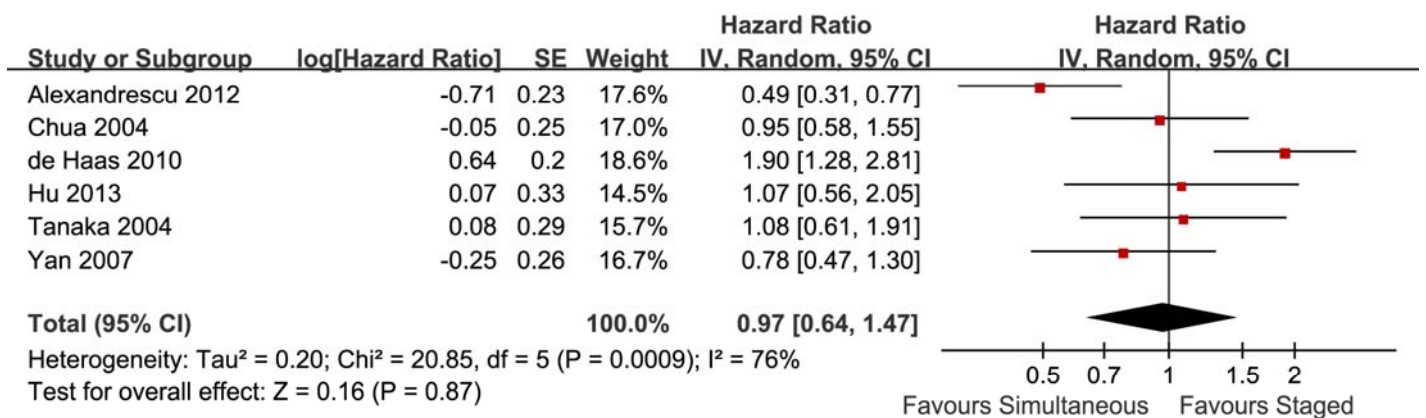

### Forest plots of the pooled results on disease-free survival.

Favours Simultaneous: Simultaneous group had longer disease-free survival.

Favours Staged: Staged group had longer disease-free survival.

Pooled result showed no significant difference between simultaneous and staged groups.
