# Supplementary material for: Timing of Hepatectomy for Resectable Synchronous Colorectal Liver Metastases: For Whom Simultaneous Resection Is More Suitable - A Meta-Analysis
Source: PubMed Central journal article supplement (PMC4122440; doi:10.1371/journal.pone.0104348), 2014-08-05
Supplement: pone.0104348.s004.pdf [file pone.0104348.s004.pdf]

# Figure S4

## Pooled number of patients need blood transfusion

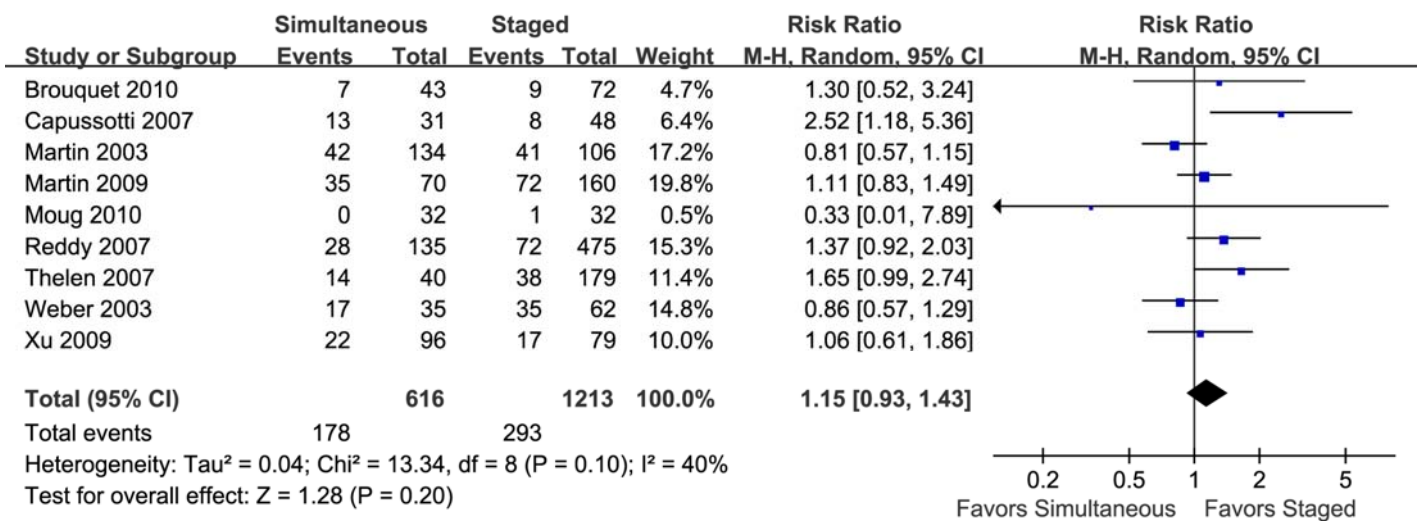

### Forest plots of the pooled results on number of patients need blood transfusion.

M-H: Mantel-Haenszel method

Favours Simultaneous: Simultaneous group had fewer patients need blood transfusion.

Favours Staged: Staged group had fewer patients need blood transfusion.

Pooled result showed no significant difference between simultaneous and staged groups.
