# Supplementary material for: Timing of Hepatectomy for Resectable Synchronous Colorectal Liver Metastases: For Whom Simultaneous Resection Is More Suitable - A Meta-Analysis
Source: PubMed Central journal article supplement (PMC4122440; doi:10.1371/journal.pone.0104348), 2014-08-05
Supplement: pone.0104348.s005.pdf [file pone.0104348.s005.pdf]

# Figure S5

## Pooled length of hospital stay

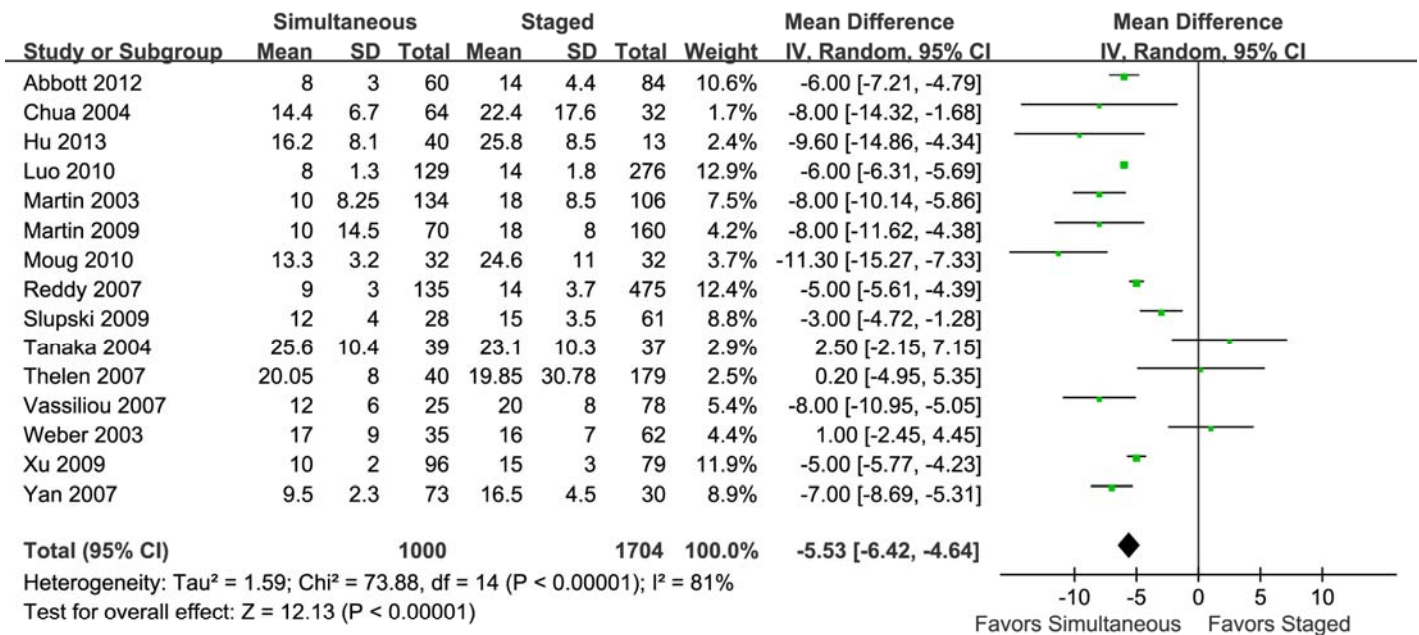

### Forest plots of the pooled results on length of hospital stay.

Favours Simultaneous: Simultaneous group had shorter hospital stay.

Favours Staged: Staged group had shorter hospital stay.

Pooled result showed that simultaneous resections significantly reduced the length of hospital stay.
