# Supplementary material for: Timing of Hepatectomy for Resectable Synchronous Colorectal Liver Metastases: For Whom Simultaneous Resection Is More Suitable - A Meta-Analysis
Source: PubMed Central journal article supplement (PMC4122440; doi:10.1371/journal.pone.0104348), 2014-08-05
Supplement: pone.0104348.s006.pdf [file pone.0104348.s006.pdf]

# Figure S6

## Corrected subtype analysis of postoperative morbidity

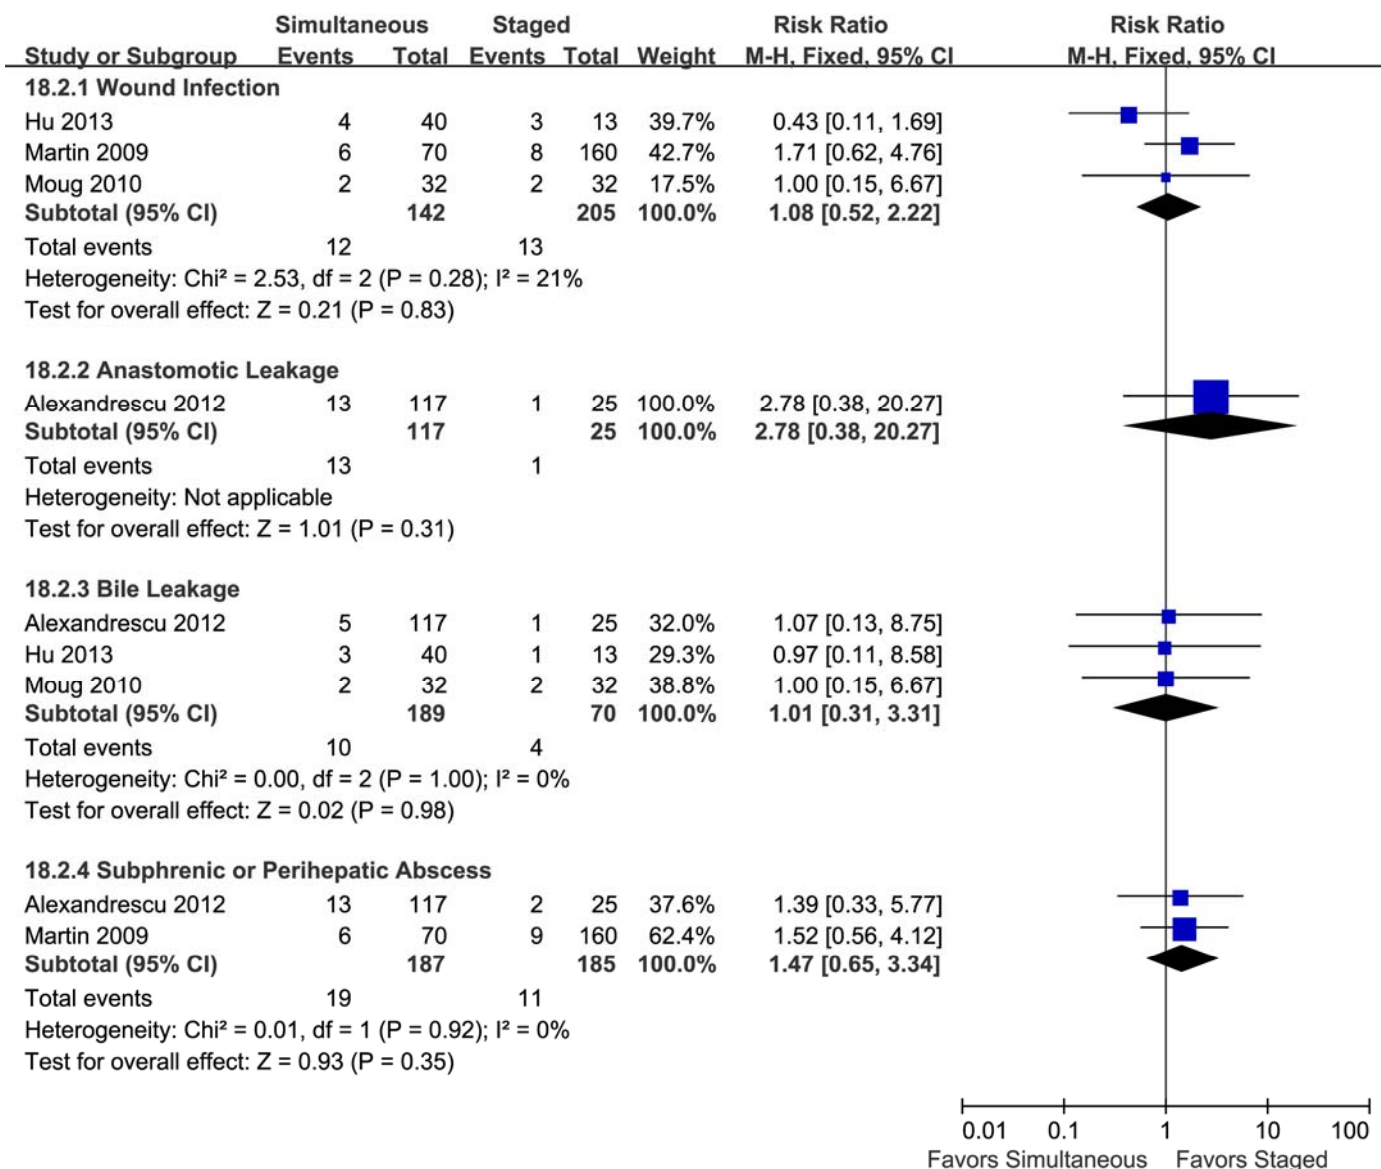

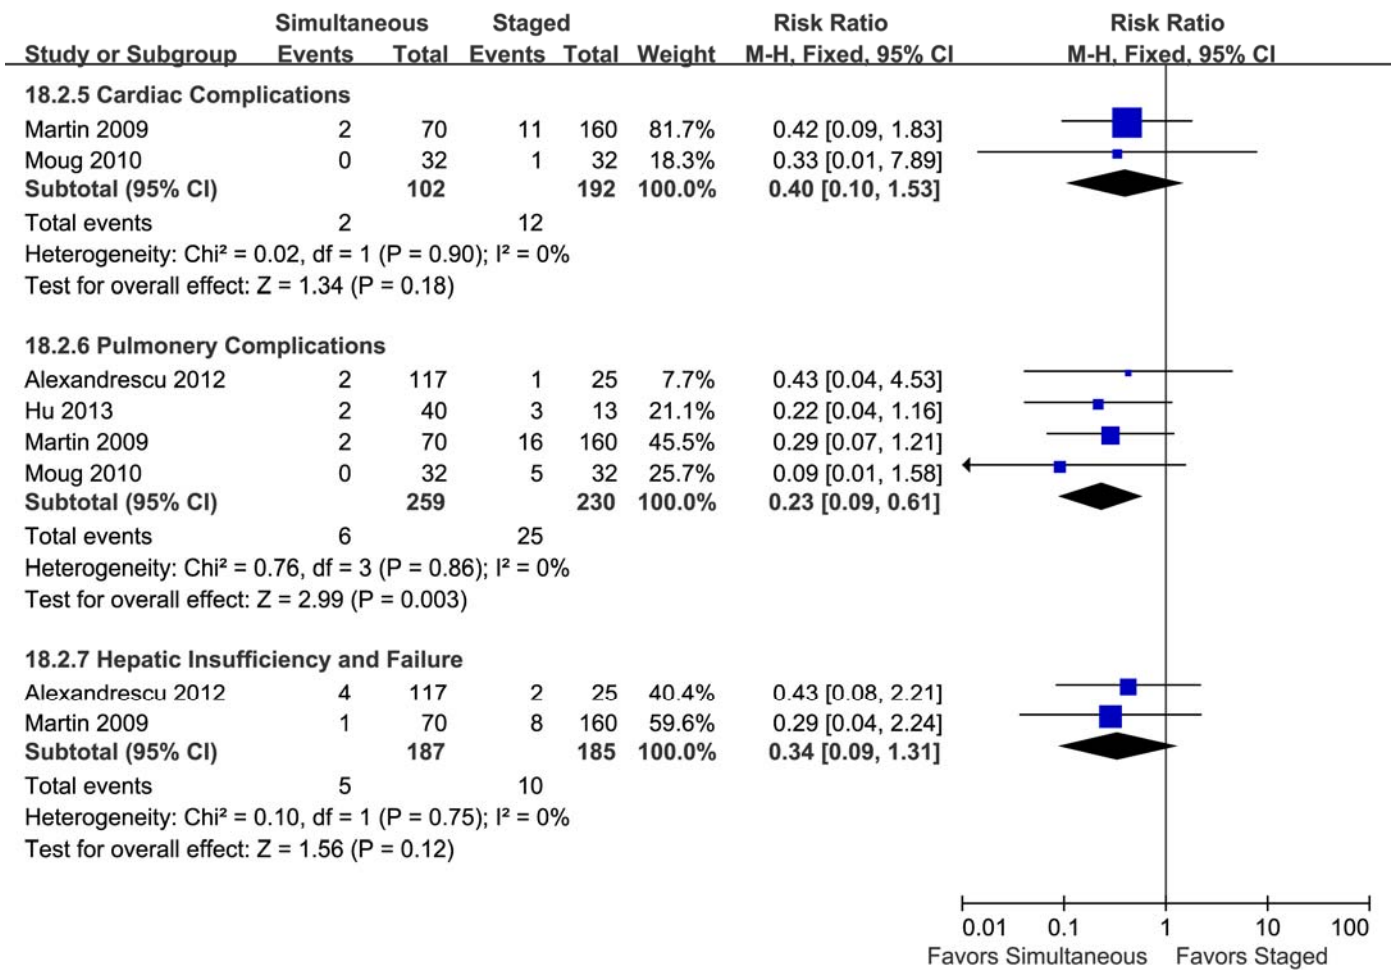

### Forest plots of the corrected subtype analysis of postoperative morbidity.

M-H: Mantel-Haenszel method

Favours Simultaneous: Simultaneous group had lower postoperative morbidity.

Favours Staged: Staged group had lower postoperative morbidity.

All results were corrected according to baseline analyses.

Pooled result showed significant difference between simultaneous and staged groups only in pulmonary complications. No other significant difference was observed.
