# Supplementary material for: Timing of Hepatectomy for Resectable Synchronous Colorectal Liver Metastases: For Whom Simultaneous Resection Is More Suitable - A Meta-Analysis
Source: PubMed Central journal article supplement (PMC4122440; doi:10.1371/journal.pone.0104348), 2014-08-05
Supplement: pone.0104348.s007.pdf [file pone.0104348.s007.pdf]

# Figure S7

## Baseline imbalance of preoperative chemotherapy

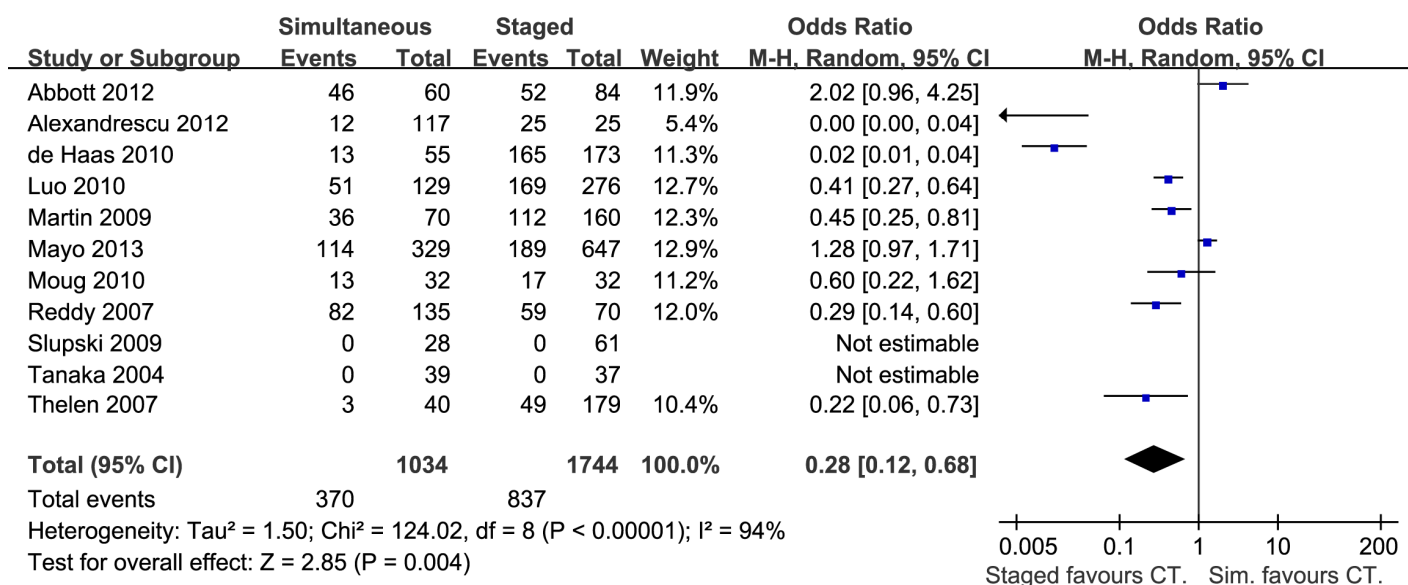

### Forest plots of the baseline imbalance of preoperative chemotherapy.

M-H: Mantel-Haenszel method

Staged favours CT.: More patients in staged group received preoperative chemotherapy.

Sim. favours CT.: More patients in simultaneous group received preoperative chemotherapy.

Pooled result showed that significantly more patients in staged group received preoperative chemotherapy. There was significant baseline imbalance of preoperative chemotherapy.
