# Supplementary material for: Timing of Hepatectomy for Resectable Synchronous Colorectal Liver Metastases: For Whom Simultaneous Resection Is More Suitable - A Meta-Analysis
Source: PubMed Central journal article supplement (PMC4122440; doi:10.1371/journal.pone.0104348), 2014-08-05
Supplement: pone.0104348.s008.pdf [file pone.0104348.s008.pdf]

# Figure S8

## Subgroup analysis of postoperative morbidity on preoperative chemotherapy

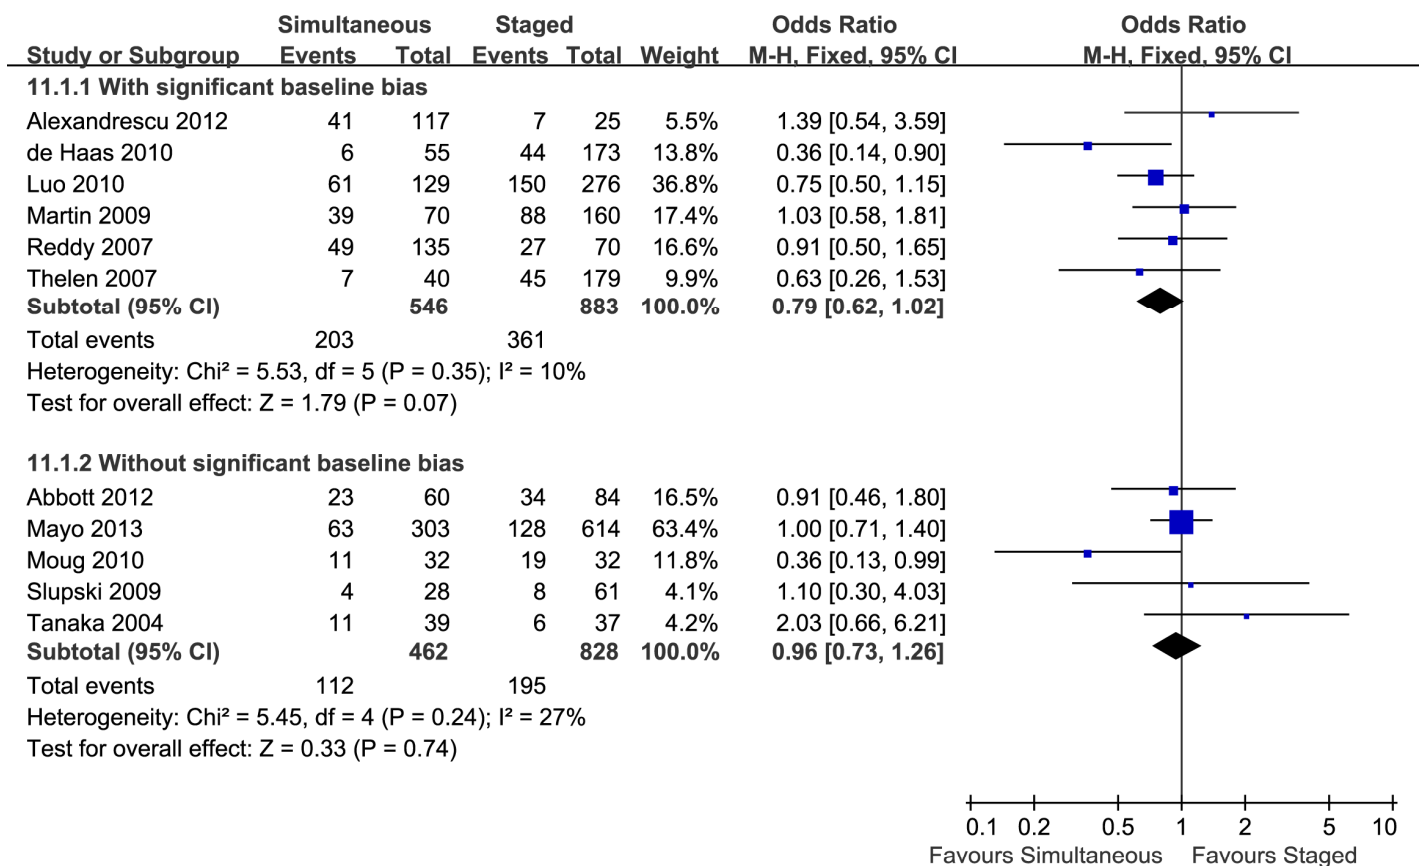

### Forest plots of subgroup analysis of postoperative morbidity on preoperative chemotherapy.

Favours Simultaneous: Simultaneous group had lower postoperative morbidity.

Favours Staged: Staged group had lower postoperative morbidity.

The overlap regions of 95% confidence interval between the two subgroups showed that preoperative chemotherapy did not significantly interfere with the postoperative morbidity.
