# Supplementary material for: Timing of Hepatectomy for Resectable Synchronous Colorectal Liver Metastases: For Whom Simultaneous Resection Is More Suitable - A Meta-Analysis
Source: PubMed Central journal article supplement (PMC4122440; doi:10.1371/journal.pone.0104348), 2014-08-05
Supplement: pone.0104348.s009.pdf [file pone.0104348.s009.pdf]

# Figure S9

## Publication Bias Test

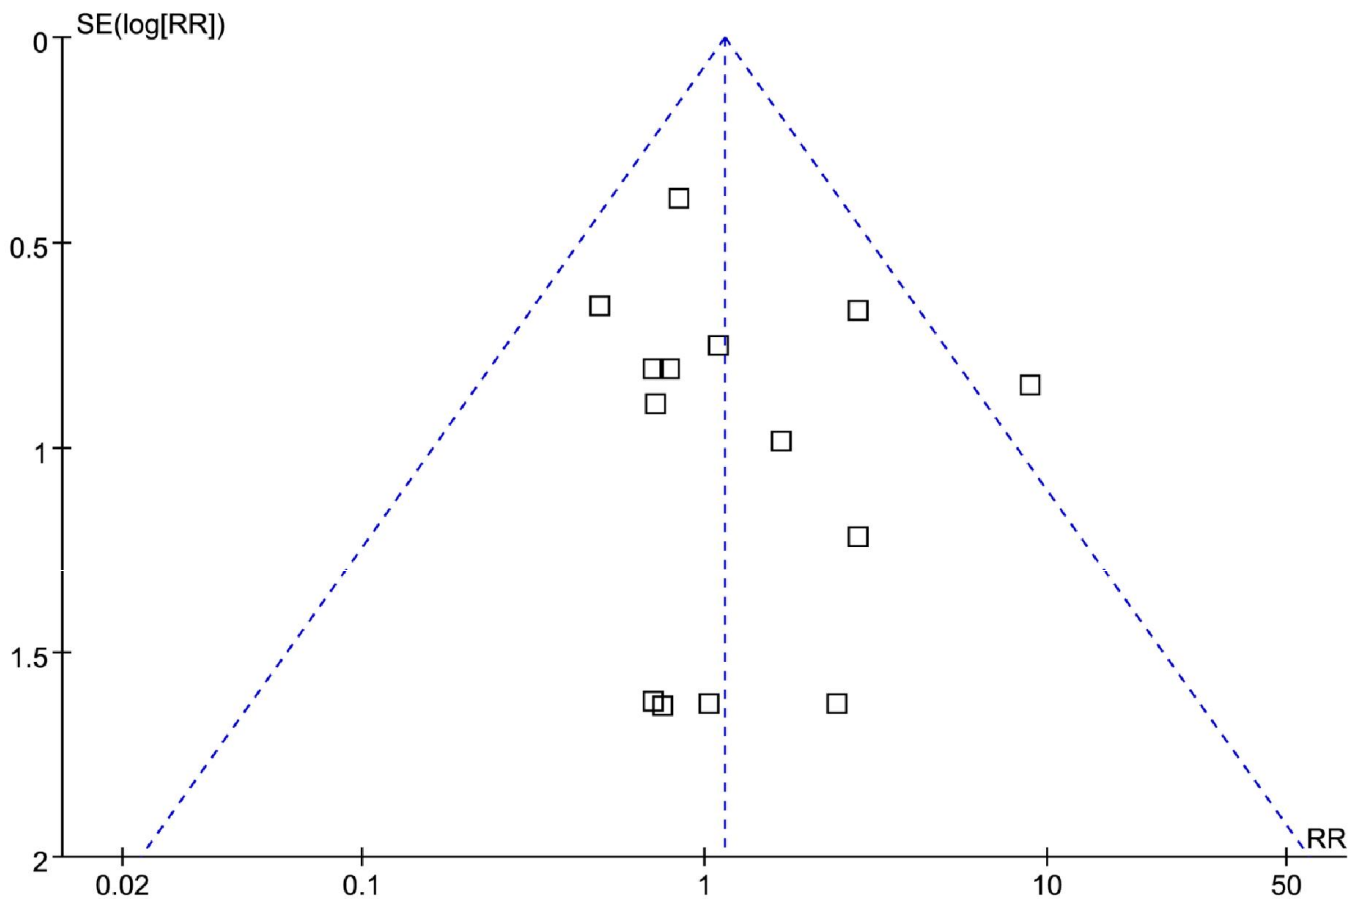

**Funnel plot for all studies comparing postoperative mortality.**

Each study is marked by a dot around the overall effect estimate (vertical line). The diagonal lines represent the 95% confidence interval around the overall effect estimate. The symmetrical distribution of all dots showed that there was no significant publication bias. RR, risk ratio; SE, standard error.

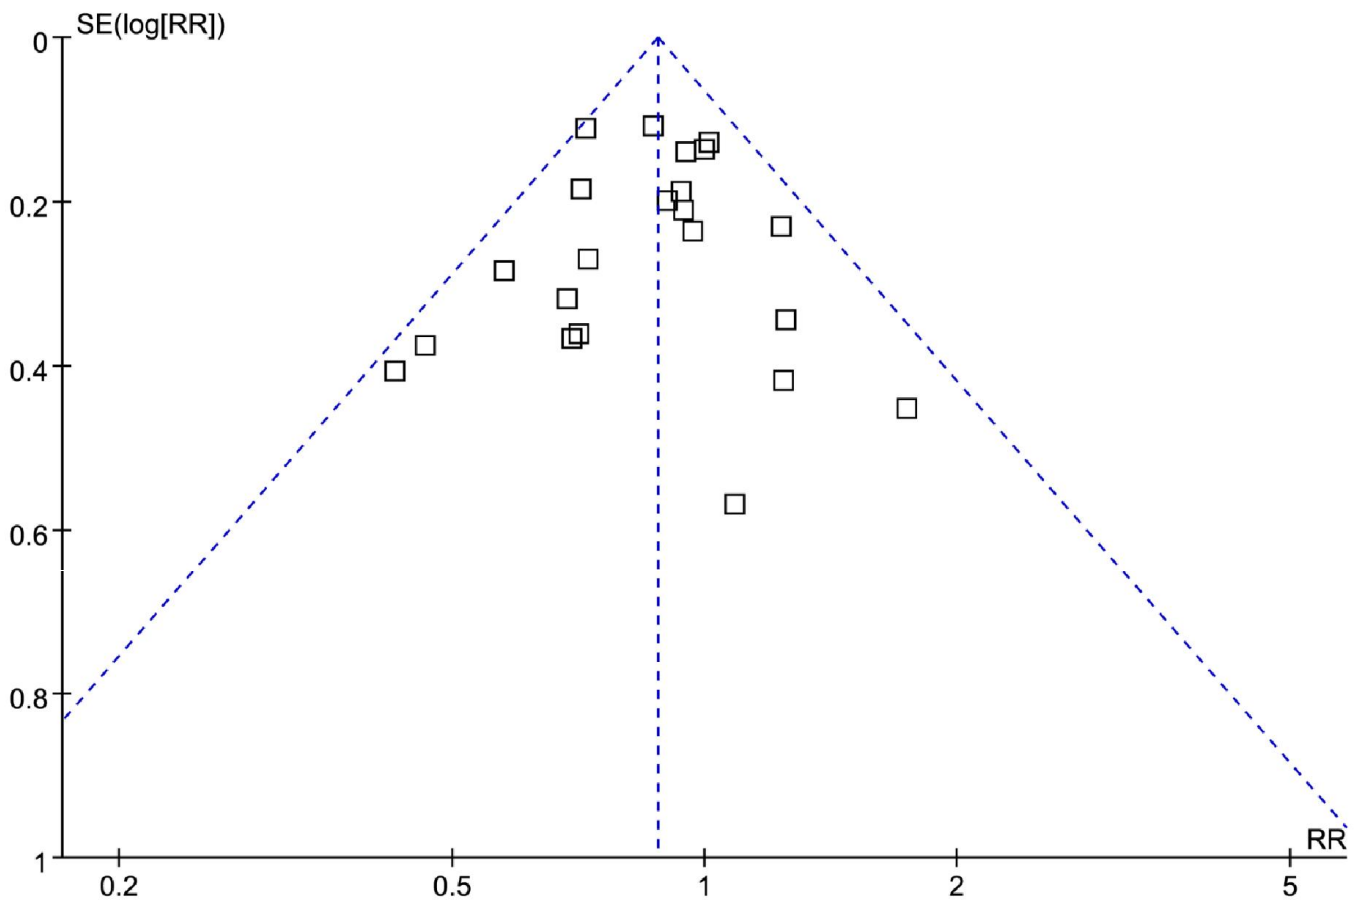

**Funnel plot for all studies comparing postoperative morbidity.**

Each study is marked by a dot around the overall effect estimate (vertical line). The diagonal lines represent the 95% confidence interval around the overall effect estimate. The symmetrical distribution of all dots showed that there was no significant publication bias. RR, risk ratio; SE, standard error.

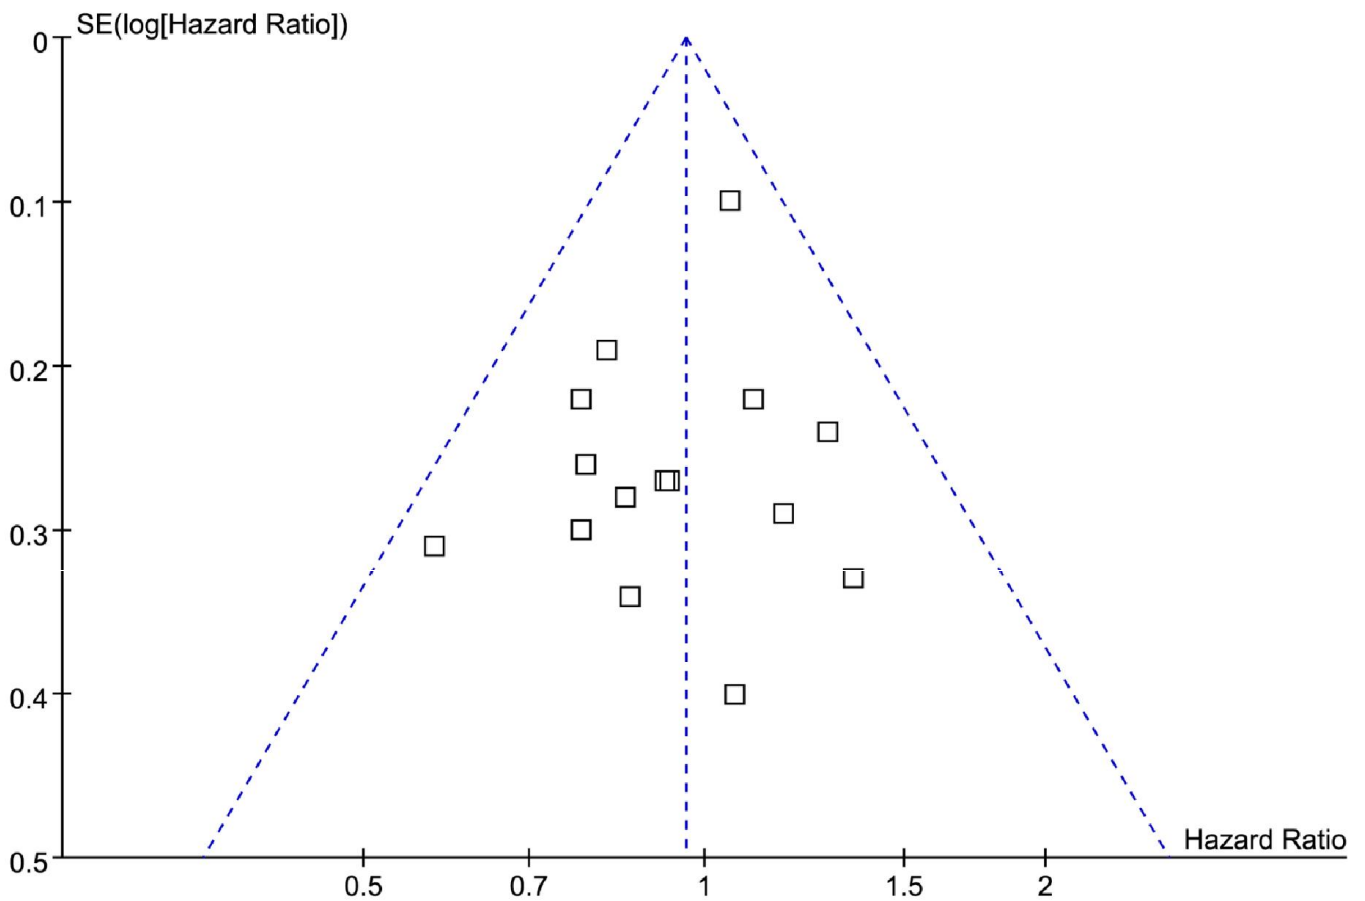

**Funnel plot for all studies comparing overall survival.**

Each study is marked by a dot around the overall effect estimate (vertical line). The diagonal lines represent the 95% confidence interval around the overall effect estimate. The symmetrical distribution of all dots showed that there was no significant publication bias. SE, standard error.
