# Supplementary material for: Timing of Hepatectomy for Resectable Synchronous Colorectal Liver Metastases: For Whom Simultaneous Resection Is More Suitable - A Meta-Analysis
Source: PubMed Central journal article supplement (PMC4122440; doi:10.1371/journal.pone.0104348), 2014-08-05
Supplement: pone.0104348.s010.pdf [file pone.0104348.s010.pdf]

Table S1 Quality assessment of studies included in the meta-analysis

| Studies            | Total score | Selection                |                              |                           |                                           | Comparability                    |                                    | Outcome               |                       |                                  |
|--------------------|-------------|--------------------------|------------------------------|---------------------------|-------------------------------------------|----------------------------------|------------------------------------|-----------------------|-----------------------|----------------------------------|
|                    |             | Exposed cohort selection | Non-exposed cohort selection | Ascertainment of exposure | Outcome was not present at start of study | Select the most important factor | Controls for any additional factor | Assessment of outcome | Follow-up long enough | Adequacy of follow up of cohorts |
| Abbott 2012        | 9           | 1                        | 1                            | 1                         | 1                                         | 1                                | 1                                  | 1                     | 1                     | 1                                |
| Alexandrescu 2012  | 7           | 1                        | 1                            | 1                         | 1                                         | 1                                | 1                                  | 1                     | 0                     | 0                                |
| Brouquet 2010      | 8           | 1                        | 1                            | 1                         | 1                                         | 1                                | 1                                  | 1                     | 0                     | 1                                |
| Capussotti 2007    | 8           | 1                        | 1                            | 1                         | 1                                         | 1                                | 0                                  | 1                     | 1                     | 1                                |
| Chua 2004          | 6           | 1                        | 1                            | 1                         | 1                                         | 1                                | 0                                  | 1                     | 0                     | 0                                |
| de Haas 2010       | 9           | 1                        | 1                            | 1                         | 1                                         | 1                                | 1                                  | 1                     | 1                     | 1                                |
| Hu 2013            | 8           | 1                        | 1                            | 1                         | 1                                         | 1                                | 0                                  | 1                     | 1                     | 1                                |
| Luo 2010           | 6           | 1                        | 1                            | 1                         | 1                                         | 1                                | 0                                  | 1                     | 0                     | 0                                |
| Martin 2003        | 7           | 1                        | 1                            | 1                         | 1                                         | 1                                | 1                                  | 1                     | 0                     | 0                                |
| Martin 2009        | 7           | 1                        | 1                            | 1                         | 1                                         | 1                                | 1                                  | 1                     | 0                     | 0                                |
| Mayo 2013          | 8           | 1                        | 1                            | 1                         | 1                                         | 1                                | 1                                  | 1                     | 1                     | 0                                |
| Moug 2010          | 7           | 1                        | 1                            | 1                         | 1                                         | 1                                | 1                                  | 1                     | 0                     | 0                                |
| Reddy 2007         | 6           | 1                        | 1                            | 1                         | 1                                         | 1                                | 0                                  | 1                     | 0                     | 0                                |
| Slupski 2009       | 6           | 1                        | 1                            | 1                         | 1                                         | 1                                | 0                                  | 1                     | 0                     | 0                                |
| Tanaka 2004        | 7           | 1                        | 1                            | 1                         | 1                                         | 1                                | 0                                  | 1                     | 1                     | 0                                |
| Thelen 2007        | 8           | 1                        | 1                            | 1                         | 1                                         | 1                                | 1                                  | 1                     | 1                     | 0                                |
| Turrini 2007       | 8           | 1                        | 1                            | 1                         | 1                                         | 1                                | 0                                  | 1                     | 1                     | 1                                |
| Vassiliou 2007     | 6           | 1                        | 1                            | 1                         | 1                                         | 1                                | 0                                  | 1                     | 0                     | 0                                |
| Wang 2008          | 8           | 1                        | 1                            | 1                         | 1                                         | 1                                | 1                                  | 1                     | 1                     | 0                                |
| Weber 2003         | 7           | 1                        | 1                            | 1                         | 1                                         | 1                                | 0                                  | 1                     | 1                     | 0                                |
| Xu 2009            | 7           | 1                        | 1                            | 1                         | 1                                         | 1                                | 0                                  | 1                     | 1                     | 0                                |
| Yan 2007           | 6           | 1                        | 1                            | 1                         | 1                                         | 1                                | 0                                  | 1                     | 0                     | 0                                |
| Vigano 2011*       | 5           | 0                        | 0                            | 1                         | 1                                         | 1                                | 0                                  | 1                     | 1                     | 0                                |
| van der Pool 2010* | 4           | 0                        | 0                            | 1                         | 1                                         | 1                                | 0                                  | 1                     | 0                     | 0                                |

Exposed cohort: patients received simultaneous resection.

Non-exposed cohort: patients received staged resection.

Ascertainment of exposure: patients' information came from reliable medical records.

Outcome was not present at start of study: patients received no colorectal or hepatic surgery before.

Select the most important factor: the study compared short-term and/or long-term outcomes between simultaneous and staged resection groups.

Controls for any additional factor: in the study, univariate and multivariate analysis was conducted to exclude the potential confounders.

Assessment of outcome: patients' information came from reliable medical records; perioperative mortality contained death in at least 30 days after the hepatectomy; if long-term survival was reported, it should be in the form of survival curves or 1, 3, 5-year rates.

Follow-up long enough: median or mean follow-up was considered long enough at least 30 months.

Adequacy of follow up of cohorts: the lost of follow up was reported, and was lower than 20%.

Quality of studies was considered high with NOS score  $\geq 6$ . The studies with NOS score  $< 6$  were considered low quality, and would not be included in meta-analysis.

\*: studies excluded because of the low quality.
