# Supplementary material for: Timing of Hepatectomy for Resectable Synchronous Colorectal Liver Metastases: For Whom Simultaneous Resection Is More Suitable - A Meta-Analysis
Source: PubMed Central journal article supplement (PMC4122440; doi:10.1371/journal.pone.0104348), 2014-08-05
Supplement: pone.0104348.s011.pdf [file pone.0104348.s011.pdf]

Table S2 Summarized prognostic factors for SCRLM within studies included

| Studies           | Total patients | Analysis for | Prognostic factors                                                                                                                                                                                                                        |              |                     |              |
|-------------------|----------------|--------------|-------------------------------------------------------------------------------------------------------------------------------------------------------------------------------------------------------------------------------------------|--------------|---------------------|--------------|
|                   |                |              | Simultaneous resection                                                                                                                                                                                                                    |              | Delayed resection   |              |
|                   |                |              | Significant factors                                                                                                                                                                                                                       | Analysis     | Significant factors | Analysis     |
| Abbott 2012       | 144            |              | -                                                                                                                                                                                                                                         | No analysis  | -                   | No analysis  |
| Alexandrescu 2012 | 142            |              | -                                                                                                                                                                                                                                         | No analysis  | -                   | No analysis  |
| Brouquet 2010     | 115            | OS           | Liver tumor size > 3cm<br>Need for a second line of preoperative chemotherapy                                                                                                                                                             |              |                     | Univariate   |
|                   |                |              | Liver tumor size > 3cm                                                                                                                                                                                                                    |              |                     | Multivariate |
| Capussotti 2007   | 127            | OS           | Male sex<br>T4<br>Multiple metastases<br>Liver metastases $\geq$ 4<br>Metastatic infiltration of nearby structures                                                                                                                        | Univariate   | None                | Univariate   |
|                   |                |              | Male sex<br>T4<br>Liver metastases $\geq$ 4<br>Metastatic infiltration of nearby structures                                                                                                                                               | Multivariate | None                | Multivariate |
| Chua 2004         | 96             | -            | -                                                                                                                                                                                                                                         | No analysis  | -                   | No analysis  |
| de Haas 2010      | 228            | R            | Liver metastases $\geq$ 3<br>Bilobar distribution<br>Initially unresectable metastases<br>Preop. chemotherapy<br>Timing of liver resection<br>Extrahepatic disease<br>Non-anatomical resection<br>Margin involved<br>Postop. chemotherapy |              |                     | Univariate   |
|                   |                |              | Liver metastases $\geq$ 3<br>Initially unresectable<br>Timing of liver resection                                                                                                                                                          |              |                     | Multivariate |
| Hu 2013           | 53             | -            | -                                                                                                                                                                                                                                         | No analysis  | -                   | No analysis  |
| Luo 2010          | 405            | CM           | None                                                                                                                                                                                                                                      |              |                     | Univariate   |
|                   |                |              | None                                                                                                                                                                                                                                      |              |                     | Multivariate |
| Martin 2003       | 240            | CM           | Pulmonary history<br>Past abdominal surgery<br>Extent hepatic resection $\geq$ lobectomy<br>Timing of liver resection<br>Type of liver resection                                                                                          |              |                     | Univariate   |

|                |     |    |                                                                                                                                 |              |                                                                                                                    |              |
|----------------|-----|----|---------------------------------------------------------------------------------------------------------------------------------|--------------|--------------------------------------------------------------------------------------------------------------------|--------------|
|                |     |    | Pulmonary history<br>Past abdominal surgery<br>Timing of liver resection                                                        |              |                                                                                                                    | Multivariate |
| Martin 2009    | 230 | CM | Blood transfusion<br>Extent hepatic resection $\geq$ lobectomy<br>Type of liver resection/ablation                              |              |                                                                                                                    | Univariate   |
|                |     |    | Blood transfusion                                                                                                               |              |                                                                                                                    | Multivariate |
| Mayo 2013      | 976 | CM | Largest CRLM $>3.5$ cm<br>Major hepatic resection                                                                               |              |                                                                                                                    | Univariate   |
|                |     |    | Bilateral hepatic disease<br>Major hepatic resection                                                                            |              |                                                                                                                    | Multivariate |
|                |     | OS | Male sex<br>Rectal primary<br>$>2$ Colorectal liver metastases<br>Minor hepatic resection<br>Combined resection $\neq$ ablation |              |                                                                                                                    | Univariate   |
|                |     |    | Male sex<br>Rectal primary<br>Minor hepatic resection<br>Combined resection $\neq$ ablation                                     |              |                                                                                                                    | Multivariate |
| Moug 2010      | 64  | -  | -                                                                                                                               | No analysis  | -                                                                                                                  | No analysis  |
| Reddy 2007     | 610 | CM | Liver metastases $\geq 4$                                                                                                       | Univariate   | -                                                                                                                  | No analysis  |
| Slupski 2009   | 89  | -  | -                                                                                                                               | No analysis  | -                                                                                                                  | No analysis  |
| Tanaka 2004    | 76  | OS | Resected liver volume<br>Age $\geq 70$ years<br>Poorly differentiated primary/ mucinous adenocarcinoma                          | Univariate   | Duration of operation                                                                                              | Univariate   |
|                |     |    | Poorly differentiated primary/ mucinous adenocarcinoma                                                                          | Multivariate | None                                                                                                               | Multivariate |
| Thelen 2007    | 219 | OS | Extent hepatic resection $\geq$ lobectomy                                                                                       | Univariate   | Extent hepatic resection $\geq$ lobectomy<br>Margin involved<br>Liver metastases $\geq 4$<br>Node-positive primary | Univariate   |
|                |     |    | None                                                                                                                            | Multivariate | Node-positive primary<br>Liver metastases $\geq 4$<br>Margin involved                                              | Multivariate |
| Turrini 2007   | 119 | OS | None                                                                                                                            | None         |                                                                                                                    | Univariate   |
| Vassiliou 2007 | 103 | -  | -                                                                                                                               | No analysis  | -                                                                                                                  | No analysis  |

|            |     |    |      |             |   |             |
|------------|-----|----|------|-------------|---|-------------|
| Wang 2008  | 83  | -  | -    | No analysis | - | No analysis |
| Weber 2003 | 97  | OS | None |             |   | Univariate  |
| Xu 2009    | 175 | -  | -    | No analysis | - | No analysis |
| Yan 2007   | 103 | -  | -    | No analysis | - | No analysis |

Only statistically significant factors ( $P < 0.05$ ) were listed in the table.

OS, Overall survival; CM, Complication morbidity; R, Recurrence.

No analysis, No univariate or multivariate analysis was conducted in the study.

None, univariate or multivariate was conducted in the analysis, but no statistically significant factors were found.
