# Supplementary material for: Timing of Hepatectomy for Resectable Synchronous Colorectal Liver Metastases: For Whom Simultaneous Resection Is More Suitable - A Meta-Analysis
Source: PubMed Central journal article supplement (PMC4122440; doi:10.1371/journal.pone.0104348), 2014-08-05
Supplement: pone.0104348.s012.pdf [file pone.0104348.s012.pdf]

Table S3 Sensitivity analysis

| Studies omitted             | Postoperative mortality  |             | Postoperative morbidity  |              | Overall survival         |             |
|-----------------------------|--------------------------|-------------|--------------------------|--------------|--------------------------|-------------|
|                             | Repoled RR<br>[95%CI]    | P           | Repoled RR<br>[95%CI]    | P            | Repoled HR<br>[95%CI]    | P           |
| <b>All studies included</b> | <b>1.14 [0.77, 1.69]</b> | <b>0.52</b> | <b>0.88 [0.81, 0.96]</b> | <b>0.003</b> | <b>0.96 [0.86, 1.08]</b> | <b>0.50</b> |
| <b>Abbott 2012</b>          | 1.10 [0.74, 1.65]        | 0.63        | 0.87 [0.80, 0.96]        | 0.003        | -                        | -           |
| <b>Alexandrescu 2012</b>    | 1.23 [0.81, 1.87]        | 0.34        | 0.87 [0.80, 0.95]        | 0.002        | 0.97 [0.86, 1.09]        | 0.60        |
| <b>Brouquet 2010</b>        | 1.12 [0.75, 1.68]        | 0.59        | 0.88 [0.80, 0.96]        | 0.004        | 0.97 [0.86, 1.09]        | 0.63        |
| <b>Capussotti 2007</b>      | 1.12 [0.75, 1.67]        | 0.58        | 0.87 [0.80, 0.95]        | 0.003        | 0.94 [0.84, 1.06]        | 0.34        |
| <b>Chua 2004</b>            | 1.14 [0.77, 1.69]        | 0.52        | 0.89 [0.81, 0.97]        | 0.007        | 0.95 [0.85, 1.07]        | 0.42        |
| <b>de Haas 2010</b>         | 1.14 [0.76, 1.70]        | 0.52        | 0.89 [0.82, 0.97]        | 0.010        | 0.95 [0.85, 1.07]        | 0.40        |
| <b>Hu 2013</b>              | 1.14 [0.77, 1.69]        | 0.52        | 0.88 [0.81, 0.96]        | 0.006        | 0.96 [0.86, 1.08]        | 0.48        |
| <b>Luo 2010</b>             | 1.18 [0.78, 1.78]        | 0.42        | 0.88 [0.80, 0.97]        | 0.007        | -                        | -           |
| <b>Martin 2003</b>          | 1.17 [0.78, 1.76]        | 0.45        | 0.90 [0.82, 0.99]        | 0.020        | -                        | -           |
| <b>Martin 2009</b>          | 1.15 [0.77, 1.71]        | 0.50        | 0.87 [0.79, 0.95]        | 0.002        | -                        | -           |
| <b>Mayo 2013</b>            | 1.30 [0.81, 2.06]        | 0.27        | 0.86 [0.79, 0.94]        | 0.001        | 0.92 [0.80, 1.06]        | 0.24        |
| <b>Moug 2010</b>            | 1.14 [0.77, 1.69]        | 0.52        | 0.89 [0.81, 0.97]        | 0.007        | -                        | -           |
| <b>Reddy 2007</b>           | 1.04 [0.68, 1.59]        | 0.84        | 0.87 [0.80, 0.96]        | 0.003        | -                        | -           |
| <b>Slupski 2009</b>         | 1.15 [0.77, 1.72]        | 0.50        | 0.88 [0.80, 0.96]        | 0.003        | 0.96 [0.86, 1.08]        | 0.54        |
| <b>Tanaka 2004</b>          | 1.14 [0.77, 1.69]        | 0.52        | 0.87 [0.80, 0.95]        | 0.002        | 0.98 [0.87, 1.10]        | 0.72        |
| <b>Thelen 2007</b>          | 1.00 [0.65, 1.52]        | 0.99        | 0.88 [0.81, 0.96]        | 0.002        | 0.95 [0.85, 1.07]        | 0.41        |
| <b>Turrini 2007</b>         | 1.17 [0.78, 1.76]        | 0.45        | 0.88 [0.81, 0.96]        | 0.005        | 0.98 [0.87, 1.10]        | 0.71        |
| <b>Vassiliou 2007</b>       | 1.14 [0.77, 1.69]        | 0.52        | 0.87 [0.80, 0.96]        | 0.003        | -                        | -           |
| <b>Wang 2008</b>            | 1.14 [0.77, 1.69]        | 0.52        | 0.87 [0.80, 0.95]        | 0.002        | 0.96 [0.86, 1.08]        | 0.53        |
| <b>Weber 2003</b>           | 1.14 [0.77, 1.69]        | 0.52        | 0.88 [0.81, 0.96]        | 0.004        | 0.96 [0.86, 1.08]        | 0.52        |
| <b>Xu 2009</b>              | 1.14 [0.76, 1.73]        | 0.53        | 0.86 [0.79, 0.94]        | 0.001        | 0.98 [0.87, 1.10]        | 0.69        |
| <b>Yan 2007</b>             | 1.14 [0.77, 1.69]        | 0.52        | 0.88 [0.81, 0.96]        | 0.005        | 0.97 [0.86, 1.09]        | 0.57        |

Sensitivity analyses were performed by consecutively omitting every study from all the others in the meta-analysis (leave-one-out procedure).
