# Supplementary material for: Timing of Hepatectomy for Resectable Synchronous Colorectal Liver Metastases: For Whom Simultaneous Resection Is More Suitable - A Meta-Analysis
Source: PubMed Central journal article supplement (PMC4122440; doi:10.1371/journal.pone.0104348), 2014-08-05
Supplement: pone.0104348.s014.pdf [file pone.0104348.s014.pdf]

## Information S1

### Search strategies

Search strategy for “PubMed” as follows:

((colorectal neoplasms[MeSH Terms]) AND metastas\*[Title/Abstract]) AND (simultaneous OR synchronous[Title/Abstract]) AND (resection\* OR hepatectomy[Title/Abstract]) AND ("2000/01/01"[PDat] : "2013/04/31"[PDat])

Search strategy for “Web of Science” as follows:

Topic=(colorectal cancer) AND Topic=(metastas\*) AND Topic=(simultaneous OR synchronous) AND Topic=(resection OR hepatectomy)

Timespan=2000-2013. Databases=SCI-EXPANDED, SSCI, A&HCI, CPCI-S, CPCI-SSH, CCR-EXPANDED, IC.

Search strategy for “Embase” as follows:

(colorectal cancer and metastas\*).ti. and (simultaneous or synchronous).ab. and (resection or hepatectomy).ab.
